# Supplementary material for: Transcriptome analyses reveal molecular mechanism underlying tapping panel dryness of rubber tree (Hevea brasiliensis)
Source: PubMed Central journal article supplement (PMC4804210; doi:10.1038/srep23540), 2016-03-23
Supplement: srep23540-s1.pdf [file srep23540-s1.pdf]

## Supplementary Information

### Transcriptome analyses reveal molecular mechanism underlying tapping panel dryness of rubber tree (*Hevea brasiliensis*)

Dejun Li<sup>1,+,\*</sup>, Xuncheng Wang<sup>2,3,+</sup>, Zhi Deng<sup>1</sup>, Hui Liu<sup>1</sup>, Hong Yang<sup>1</sup> and Guangming He<sup>3,\*</sup>

<sup>1</sup>Key Laboratory of Biology and Genetic Resources of Rubber Tree, Ministry of Agriculture, Rubber Research Institute, Chinese Academy of Tropical Agricultural Sciences, Baodao Xincun, Danzhou, 571737 China

<sup>2</sup>Tsinghua-Peking Center for Life Sciences, Center for Plant Biology, School of Life Sciences, Tsinghua University, Tsinghua Park No. 1, Haidian District, Beijing 100084, China

<sup>3</sup>State Key Laboratory of Protein and Plant Gene Research, Peking-Tsinghua Center for Life Sciences, School of Advanced Agriculture Sciences and School of Life Sciences, Peking University, No. 5 Yiheyuan Road, Haidian District, Beijing 100871, China

<sup>+</sup>These authors contributed equally to this work.

\*Corresponding authors; Email: [heguangming@pku.edu.cn](mailto:heguangming@pku.edu.cn), [djli.rricatas@gmail.com](mailto:djli.rricatas@gmail.com); Tel.: 86-898-23301174; Fax: 86-898-23300315;

**Supplementary table 1 The KEGG pathways of the DEGs between healthy and TPD rubber tree bark**

| Pathway ID | Pathway                                         | The DEGs with pathway annotation | All genes with pathway annotation | Pvalue     | Qvalue      |
|------------|-------------------------------------------------|----------------------------------|-----------------------------------|------------|-------------|
| ko04626    | Plant-pathogen interaction                      | 218(0.204887218045113)           | 1408(0.157688430955314)           | 5.12E-06   | 0.000609568 |
| ko00902    | Monoterpenoid biosynthesis                      | 6(0.0056390977443609)            | 13(0.00145593011535446)           | 2.94E-05   | 0.001747464 |
| ko00232    | Caffeine metabolism                             | 7(0.00657894736842105)           | 16(0.00179191398812857)           | 0.00021104 | 0.008371289 |
| ko02010    | ABC transporters                                | 23(0.0216165413533835)           | 106(0.0118714301713518)           | 0.0012931  | 0.038469844 |
| ko03410    | Base excision repair                            | 24(0.0225563909774436)           | 114(0.0127673871654161)           | 0.00167242 | 0.039803644 |
| ko00531    | Glycosaminoglycan degradation                   | 9(0.00845864661654135)           | 32(0.00358382797625714)           | 0.00302897 | 0.056944802 |
| ko00906    | Carotenoid biosynthesis                         | 15(0.01409774436090225)          | 77(0.00862358606786874)           | 0.00346375 | 0.056944802 |
| ko00562    | Inositol phosphate metabolism                   | 27(0.0253759398496241)           | 140(0.015679247396125)            | 0.00382822 | 0.056944802 |
| ko03440    | Homologous recombination                        | 13(0.012218045112782)            | 57(0.00638369358270803)           | 0.00591981 | 0.068937922 |
| ko03430    | Mismatch repair                                 | 14(0.0131578947368421)           | 63(0.00705566132825624)           | 0.00608998 | 0.068937922 |
| ko00604    | Glycosphingolipid biosynthesis - ganglio series | 6(0.0056390977443609)            | 20(0.00223989248516071)           | 0.00637241 | 0.068937922 |
| ko03018    | RNA degradation                                 | 44(0.0413533834586466)           | 268(0.0300145593011535)           | 0.01035533 | 0.102690356 |
| ko04070    | Phosphatidylinositol signaling system           | 29(0.0272556390977444)           | 166(0.0185911076268339)           | 0.01248402 | 0.114276798 |
| ko04144    | Endocytosis                                     | 53(0.049812030075188)            | 341(0.0381901668719901)           | 0.01671505 | 0.142077925 |
| ko03030    | DNA replication                                 | 17(0.0159774436090226)           | 92(0.0103035054317393)            | 0.02239763 | 0.17120964  |
| ko00195    | Photosynthesis                                  | 10(0.0093984962406015)           | 48(0.00537574196438571)           | 0.02310682 | 0.17120964  |
| ko00511    | Other glycan degradation                        | 13(0.012218045112782)            | 67(0.00750363982528839)           | 0.02445852 | 0.17120964  |
| ko00053    | Ascorbate and aldarate metabolism               | 13(0.012218045112782)            | 68(0.00761563444954642)           | 0.0275435  | 0.182093139 |
| ko00052    | Galactose metabolism                            | 19(0.0178571428571429)           | 110(0.0123194086683839)           | 0.03458403 | 0.216605241 |
| ko00600    | Sphingolipid metabolism                         | 11(0.0103383458646617)           | 58(0.00649568820696607)           | 0.03819515 | 0.226338793 |
| ko00270    | Cysteine and methionine metabolism              | 37(0.0347744360902256)           | 240(0.0268787098219285)           | 0.03994214 | 0.226338793 |
| ko04712    | Circadian rhythm - plant                        | 32(0.0300751879699248)           | 207(0.0231828872214134)           | 0.04864557 | 0.26312831  |
| ko00410    | beta-Alanine metabolism                         | 9(0.00845864661654135)           | 48(0.00537574196438571)           | 0.05335619 | 0.276060287 |
| ko00910    | Nitrogen metabolism                             | 16(0.0150375939849624)           | 96(0.0107514839287714)            | 0.06010755 | 0.298033269 |
| ko03020    | RNA polymerase                                  | 18(0.0169172932330827)           | 112(0.0125433979169)              | 0.07010266 | 0.32356933  |
| ko00904    | Diterpenoid biosynthesis                        | 8(0.0075187969924812)            | 57(0.00638369358270803)           | 0.07069582 | 0.32356933  |
| ko00240    | Pyrimidine metabolism                           | 36(0.0338345864661654)           | 246(0.0275506775674768)           | 0.07892643 | 0.347458538 |
| ko00660    | C5-Branched dibasic acid metabolism             | 2(0.0018796992481203)            | 9(0.00100795161832232)            | 0.08175495 | 0.347458538 |
| ko00310    | Lysine degradation                              | 10(0.0093984962406015)           | 60(0.00671967745548214)           | 0.09499805 | 0.389819584 |
| ko00750    | Vitamin B6 metabolism                           | 2(0.0018796992481203)            | 10(0.00111994624258036)           | 0.1068042  | 0.412914381 |

|         |                                                        |                        |                         |           |             |
|---------|--------------------------------------------------------|------------------------|-------------------------|-----------|-------------|
| ko03420 | Nucleotide excision repair                             | 22(0.0206766917293233) | 148(0.0165752043901893) | 0.1092113 | 0.412914381 |
| ko00785 | Lipoic acid metabolism                                 | 1(0.00093984962406015) | 5(0.000559973121290178) | 0.1110358 | 0.412914381 |
| ko00230 | Purine metabolism                                      | 41(0.0385338345864662) | 293(0.0328144249076044) | 0.1152464 | 0.415585503 |
| ko00950 | Isoquinoline alkaloid biosynthesis                     | 6(0.0056390977443609)  | 37(0.00414380109754732) | 0.144065  | 0.5042275   |
| ko03450 | Non-homologous end-joining                             | 4(0.0037593984962406)  | 24(0.00268787098219285) | 0.1494045 | 0.5079753   |
| ko00905 | Brassinosteroid biosynthesis                           | 2(0.0018796992481203)  | 12(0.00134393549109643) | 0.1640966 | 0.531018524 |
| ko00908 | Zeatin biosynthesis                                    | 12(0.0112781954887218) | 96(0.0107514839287714)  | 0.1651066 | 0.531018524 |
| ko00563 | Glycosylphosphatidylinositol-anchor biosynthesis       | 4(0.0037593984962406)  | 26(0.00291186023070893) | 0.1907585 | 0.591222818 |
| ko00640 | Propanoate metabolism                                  | 10(0.0093984962406015) | 69(0.00772762907380446) | 0.1937621 | 0.591222818 |
| ko00062 | Fatty acid elongation in mitochondria                  | 1(0.00093984962406015) | 7(0.000783962369806249) | 0.1989569 | 0.591896778 |
| ko00072 | Synthesis and degradation of ketone bodies             | 1(0.00093984962406015) | 8(0.000895956994064285) | 0.2453952 | 0.6952864   |
| ko00740 | Riboflavin metabolism                                  | 1(0.00093984962406015) | 8(0.000895956994064285) | 0.2453952 | 0.6952864   |
| ko00945 | Stilbenoid, diarylheptanoid and gingerol biosynthesis  | 27(0.0253759398496241) | 207(0.0231828872214134) | 0.2639202 | 0.703526678 |
| ko00280 | Valine, leucine and isoleucine degradation             | 8(0.0075187969924812)  | 59(0.0066076828312241)  | 0.2659185 | 0.703526678 |
| ko00960 | Tropane, piperidine and pyridine alkaloid biosynthesis | 6(0.0056390977443609)  | 44(0.00492776346735357) | 0.2660395 | 0.703526678 |
| ko00790 | Folate biosynthesis                                    | 4(0.0037593984962406)  | 30(0.00335983872774107) | 0.2829834 | 0.732065752 |
| ko00650 | Butanoate metabolism                                   | 8(0.0075187969924812)  | 61(0.00683167207974017) | 0.299524  | 0.758369277 |
| ko04140 | Regulation of autophagy                                | 10(0.0093984962406015) | 78(0.00873558069212678) | 0.3231985 | 0.779962103 |
| ko00500 | Starch and sucrose metabolism                          | 44(0.0413533834586466) | 352(0.0394221077388285) | 0.3282479 | 0.779962103 |
| ko00380 | Tryptophan metabolism                                  | 12(0.0112781954887218) | 95(0.0106394893045134)  | 0.3411673 | 0.779962103 |
| ko00591 | Linoleic acid metabolism                               | 9(0.00845864661654135) | 72(0.00806361294657857) | 0.3533204 | 0.779962103 |
| ko00565 | Ether lipid metabolism                                 | 10(0.0093984962406015) | 80(0.00895956994064285) | 0.3544433 | 0.779962103 |
| ko00970 | Aminoacyl-tRNA biosynthesis                            | 12(0.0112781954887218) | 97(0.0108634785530295)  | 0.3699014 | 0.779962103 |
| ko00071 | Fatty acid metabolism                                  | 11(0.0103383458646617) | 89(0.00996752155896517) | 0.3701916 | 0.779962103 |
| ko00360 | Phenylalanine metabolism                               | 17(0.0159774436090226) | 138(0.0154552581476089) | 0.378506  | 0.779962103 |
| ko04120 | Ubiquitin mediated proteolysis                         | 52(0.0488721804511278) | 425(0.0475977153096651) | 0.381761  | 0.779962103 |
| ko00780 | Biotin metabolism                                      | 1(0.00093984962406015) | 11(0.00123194086683839) | 0.3838404 | 0.779962103 |
| ko00603 | Glycosphingolipid biosynthesis - globo series          | 1(0.00093984962406015) | 11(0.00123194086683839) | 0.3838404 | 0.779962103 |
| ko00350 | Tyrosine metabolism                                    | 9(0.00845864661654135) | 74(0.00828760219509463) | 0.3867039 | 0.779962103 |
| ko00860 | Porphyrin and chlorophyll metabolism                   | 7(0.00657894736842105) | 67(0.00750363982528839) | 0.4047899 | 0.802833302 |
| ko00340 | Histidine metabolism                                   | 5(0.00469924812030075) | 44(0.00492776346735357) | 0.4292308 | 0.837351889 |
| ko00590 | Arachidonic acid metabolism                            | 2(0.0018796992481203)  | 21(0.00235188710941875) | 0.4650482 | 0.879978597 |
| ko00402 | Benzoxazinoid biosynthesis                             | 6(0.0056390977443609)  | 54(0.00604770970993392) | 0.4676405 | 0.879978597 |
| ko00630 | Glyoxylate and dicarboxylate metabolism                | 5(0.00469924812030075) | 46(0.00515175271586964) | 0.4732658 | 0.879978597 |

|         |                                                     |                        |                         |           |             |
|---------|-----------------------------------------------------|------------------------|-------------------------|-----------|-------------|
| ko00903 | Limonene and pinene degradation                     | 23(0.0216165413533835) | 200(0.0223989248516071) | 0.5185549 | 0.949354355 |
| ko00300 | Lysine biosynthesis                                 | 1(0.00093984962406015) | 15(0.00167991936387053) | 0.5485605 | 0.989071205 |
| ko00592 | alpha-Linolenic acid metabolism                     | 12(0.0112781954887218) | 114(0.0127673871654161) | 0.6111046 | 0.9990973   |
| ko00460 | Cyanoamino acid metabolism                          | 9(0.00845864661654135) | 88(0.00985552693470713) | 0.6133489 | 0.9990973   |
| ko00196 | Photosynthesis - antenna proteins                   | 3(0.00281954887218045) | 35(0.00391981184903125) | 0.6134971 | 0.9990973   |
| ko00730 | Thiamine metabolism                                 | 2(0.0018796992481203)  | 26(0.00291186023070893) | 0.6139203 | 0.9990973   |
| ko00760 | Nicotinate and nicotinamide metabolism              | 3(0.00281954887218045) | 36(0.00403180647328928) | 0.6362973 | 0.9990973   |
| ko01100 | Metabolic pathways                                  | 352(0.330827067669173) | 3015(0.337663792137977) | 0.6792704 | 0.9990973   |
| ko00564 | Glycerophospholipid metabolism                      | 18(0.0169172932330827) | 176(0.0197110538694143) | 0.7127912 | 0.9990973   |
| ko03022 | Basal transcription factors                         | 14(0.0131578947368421) | 142(0.0159032366446411) | 0.7298454 | 0.9990973   |
| ko00670 | One carbon pool by folate                           | 2(0.0018796992481203)  | 31(0.0034718333519991)  | 0.7321857 | 0.9990973   |
| ko04650 | Natural killer cell mediated cytotoxicity           | 8(0.0075187969924812)  | 90(0.0100795161832232)  | 0.7604598 | 0.9990973   |
| ko00480 | Glutathione metabolism                              | 9(0.00845864661654135) | 100(0.0111994624258036) | 0.7681707 | 0.9990973   |
| ko00770 | Pantothenate and CoA biosynthesis                   | 3(0.00281954887218045) | 43(0.00481576884309553) | 0.7704707 | 0.9990973   |
| ko04146 | Peroxisome                                          | 21(0.0197368421052632) | 211(0.0236308657184455) | 0.78037   | 0.9990973   |
| ko00051 | Fructose and mannose metabolism                     | 8(0.0075187969924812)  | 92(0.0103035054317393)  | 0.782882  | 0.9990973   |
| ko00966 | Glucosinolate biosynthesis                          | 3(0.00281954887218045) | 44(0.00492776346735357) | 0.7860388 | 0.9990973   |
| ko00620 | Pyruvate metabolism                                 | 12(0.0112781954887218) | 132(0.0147832904020607) | 0.8069577 | 0.9990973   |
| ko00130 | Ubiquinone and other terpenoid-quinone biosynthesis | 1(0.00093984962406015) | 57(0.00638369358270803) | 0.8254418 | 0.9990973   |
| ko00260 | Glycine, serine and threonine metabolism            | 6(0.0056390977443609)  | 77(0.00862358606786874) | 0.8269698 | 0.9990973   |
| ko01110 | Biosynthesis of secondary metabolites               | 163(0.153195488721805) | 1462(0.163736140665248) | 0.8277083 | 0.9990973   |
| ko00942 | Anthocyanin biosynthesis                            | 1(0.00093984962406015) | 27(0.00302385485496696) | 0.849095  | 0.9990973   |
| ko00900 | Terpenoid backbone biosynthesis                     | 5(0.00469924812030075) | 70(0.00783962369806249) | 0.855763  | 0.9990973   |
| ko00030 | Pentose phosphate pathway                           | 5(0.00469924812030075) | 71(0.00795161832232053) | 0.8648379 | 0.9990973   |
| ko00040 | Pentose and glucuronate interconversions            | 5(0.00469924812030075) | 71(0.00795161832232053) | 0.8648379 | 0.9990973   |
| ko00250 | Alanine, aspartate and glutamate metabolism         | 6(0.0056390977443609)  | 82(0.00918355918915892) | 0.8720422 | 0.9990973   |
| ko01040 | Biosynthesis of unsaturated fatty acids             | 5(0.00469924812030075) | 72(0.00806361294657857) | 0.8734343 | 0.9990973   |
| ko00940 | Phenylpropanoid biosynthesis                        | 27(0.0253759398496241) | 283(0.0316944786650241) | 0.8789119 | 0.9990973   |
| ko00290 | Valine, leucine and isoleucine biosynthesis         | 3(0.00281954887218045) | 53(0.00593571508567589) | 0.8909653 | 0.9990973   |
| ko00450 | Selenoamino acid metabolism                         | 3(0.00281954887218045) | 53(0.00593571508567589) | 0.8909653 | 0.9990973   |
| ko00920 | Sulfur metabolism                                   | 2(0.0018796992481203)  | 42(0.0047037742188375)  | 0.8917584 | 0.9990973   |
| ko00941 | Flavonoid biosynthesis                              | 16(0.0150375939849624) | 183(0.0204950162392205) | 0.8926232 | 0.9990973   |
| ko00061 | Fatty acid biosynthesis                             | 4(0.0037593984962406)  | 64(0.00716765595251428) | 0.8930343 | 0.9990973   |
| ko04145 | Phagosome                                           | 19(0.0178571428571429) | 212(0.0237428603427036) | 0.8948832 | 0.9990973   |

|         |                                                     |                        |                         |           |           |
|---------|-----------------------------------------------------|------------------------|-------------------------|-----------|-----------|
| ko04130 | SNARE interactions in vesicular transport           | 6(0.0056390977443609)  | 86(0.00963153768619106) | 0.9007033 | 0.9990973 |
| ko00400 | Phenylalanine, tyrosine and tryptophan biosynthesis | 5(0.00469924812030075) | 77(0.00862358606786874) | 0.9098257 | 0.9990973 |
| ko00010 | Glycolysis / Gluconeogenesis                        | 12(0.0112781954887218) | 152(0.0170231828872214) | 0.9272946 | 0.9990973 |
| ko00020 | Citrate cycle (TCA cycle)                           | 4(0.0037593984962406)  | 72(0.00806361294657857) | 0.941467  | 0.9990973 |
| ko00190 | Oxidative phosphorylation                           | 16(0.0150375939849624) | 205(0.0229588979728973) | 0.9635156 | 0.9990973 |
| ko00944 | Flavone and flavonol biosynthesis                   | 3(0.00281954887218045) | 67(0.00750363982528839) | 0.9661002 | 0.9990973 |
| ko00330 | Arginine and proline metabolism                     | 7(0.00657894736842105) | 113(0.012655392541158)  | 0.9671481 | 0.9990973 |
| ko00100 | Steroid biosynthesis                                | 1(0.00093984962406015) | 42(0.0047037742188375)  | 0.9678801 | 0.9990973 |
| ko03040 | Spliceosome                                         | 93(0.087406015037594)  | 947(0.10605890917236)   | 0.981682  | 0.9990973 |
| ko00710 | Carbon fixation in photosynthetic organisms         | 6(0.0056390977443609)  | 110(0.0123194086683839) | 0.9820616 | 0.9990973 |
| ko00561 | Glycerolipid metabolism                             | 5(0.00469924812030075) | 99(0.0110874678015455)  | 0.9829499 | 0.9990973 |
| ko00520 | Amino sugar and nucleotide sugar metabolism         | 11(0.0103383458646617) | 170(0.0190390861238661) | 0.9868055 | 0.9990973 |
| ko04141 | Protein processing in endoplasmic reticulum         | 36(0.0338345864661654) | 424(0.0474857206854071) | 0.987089  | 0.9990973 |
| ko03010 | Ribosome                                            | 20(0.018796992481203)  | 279(0.0312465001679919) | 0.9941975 | 0.9990973 |
| ko00510 | N-Glycan biosynthesis                               | 7(0.00657894736842105) | 140(0.015679247396125)  | 0.9957573 | 0.9990973 |
| ko03050 | Proteasome                                          | 7(0.00657894736842105) | 141(0.015791242020383)  | 0.9960871 | 0.9990973 |
| ko03060 | Protein export                                      | 3(0.00281954887218045) | 105(0.0117594355470937) | 0.9990973 | 0.9990973 |

---

**Supplementary table 2 The primers for real-time RT-PCR used in this study**

| No | Gene ID*     | Forward primer        | Reverse primer       |
|----|--------------|-----------------------|----------------------|
| 1  | Unigene44400 | AGCCAAAGGCACCTCAAGAG  | GAGTTCAAGCACGCTTCTCG |
| 2  | Unigene33065 | TGGCCTAGCAACACGTATCTG | TCCTGGTGCTGTTGTTGATG |
| 3  | Unigene23771 | CCCTTCTTGCTCTTCTTCTCG | GCACAACCCTTCAAGCTAGT |
| 4  | Unigene25831 | CTCGGTCTACCGGTTCTCCT  | CCCTCGGATGTAGAACAAGG |
| 5  | Unigene47504 | GGGTAGACTTGGATGCCATC  | GGCTATGATGGTGGGACAAC |
| 6  | Unigene30029 | CCTCCATATGGACAGCCTTC  | AACCTTACACCTGGCTGTGC |
| 7  | Unigene32295 | GAGCAATGCAGGCTATCTGG  | GACTGGAGCTTGCTTAGGGT |
| 8  | Unigene29886 | CAGCCTCGAACTCTGATTCC  | GCCACCTGAATTTGTGGTCT |
| 9  | Unigene38841 | CCATGTGCTTGAGATTGCAAC | CCTAAACGAAGGCAGATTGC |
| 10 | Unigene46408 | GAAGTTTGGTGACCCCATGT  | TCTTCCAAGTCCTTTGCACT |
| 11 | Unigene44230 | CAACAACAACGGCAGCAGAC  | ATCACCTGCGCAACTAGCAC |
| 12 | Unigene20474 | ACCATAGTTCTGGGACGACA  | ACTTCTAGCTCAGGCGATGA |
| 13 | Unigene47034 | CAATATCCAGTGCAAGGAGA  | CAAGTACTTCACCATGCGGT |
| 14 | Unigene21675 | GGTACTTAGTGTTGCGCGGA  | CCTCATTCAACGACTCCAAG |
| 15 | Unigene20545 | AGCATCACCAAGCAGTTGAG  | AGATGAGTTGGTGGCAGTGT |
| 16 | Unigene23733 | GACGGTAGTTACAGTTGGCT  | TGCCGACACAACAGAGTACT |
| 17 | Unigene46380 | GTTCTGTGCCATCTTGAGGT  | TGGGTACTATTTGATCCCA  |
| 18 | Unigene43867 | GGGCACAGGATAACAATCACA | CACTGAGACGTTGATCGTTC |
| 19 | Unigene33121 | ATGGAAGGGTCATGTGTGGT  | CATACAGGGCTGCAATGATG |
| 20 | Unigene62766 | CTGCCACTAGTTCCTCAAGTG | GAGGACACTCTATATCCCTG |
| 21 | Unigene16838 | CTCGAGGAGCTGCAATAAGAC | CAGGGAACGGGTATAGTTGA |
| 22 | Unigene5133  | TGGCAAAGAAAGGGAAAATG  | GATCCCAAACAGCTCATCGT |
| 23 | Unigene9119  | CCACAGATTTCAAGCCAACA  | AGGGACCTCACCATTGTCTG |
| 24 | Unigene48956 | ATATTCGGAGGGGCAAGAGT  | AGCTCTGGCATTACAAAAC  |
| 25 | Unigene4399  | GCAATTGGTGCAGATTGTGG  | CGAGCTGCTCTTGCACTGG  |
| 26 | Unigene65458 | CGGGATATGTGTTGCCTTCT  | TCTTCTTGCCACGGCTAGT  |
| 27 | Unigene50342 | ACAAAAGCTCAGACCCTGGA  | GGAGGAGAGGCTGACATCTG |
| 28 | Unigene65454 | TTCCTCAGTCACTACGCCA   | TAGACGACATGATCCCGACA |
| 29 | Unigene49603 | GTTTCGCACACAGGTGATGTC | TGCTAACATGCGAGAACCAG |
| 30 | Unigene41207 | GCACCTAGCTTGCCAGTTG   | AAGAGAAGCACCACCACCTC |
| 31 | AB268099     | GCTCGAAGACGATCAGATACC | TTCAGCCTTGCGACCATAAC |

\* The gene IDs, unigene32295, unigene38841, unigene62766, unigene16838, unigene4399 and AB268099 are *HbDXS*, *HbCMK*, *HbSRPP*, *HbGPPS*, *HbREF* and *18S rRNA*, respectively.
